# Supplementary material for: In Silico Insights into the Mechanism of Action of Epoxy-α-Lapachone and Epoxymethyl-Lawsone in Leishmania spp
Source: Molecules. 2021 Jun 10;26(12):3537. doi: 10.3390/molecules26123537 (PMC8229338; doi:10.3390/molecules26123537)
Supplement: Supplementary file 1 [file molecules-26-03537-s001.zip › molecules-1178413-supplementary.pdf]

## Supplementary files

**Table 1.** Hydrogen bonds between trypanosomatid protein and their respective ligands.

| Glyceraldehyde-3-Phosphate Dehydrogenase |        |      |      |      |   | Cytochrome c                    |      |      |   | Lanosterol-14-alpha demetilase  |      |      |      |      |   |
|------------------------------------------|--------|------|------|------|---|---------------------------------|------|------|---|---------------------------------|------|------|------|------|---|
| Protein ligand complex (NAD*)            |        |      |      |      |   | Protein ligand complex (HEME**) |      |      |   | Protein ligand complex (HEME**) |      |      |      |      |   |
| 1GYP                                     | 1GYQ** | 3DMT | 1QXS | 4P8R |   | 4DY9                            | 4GED | 3RIV |   | 2X2N                            | 2WV2 | 2WVZ | 3L4D | 3P99 |   |
| Number of binding                        |        |      |      |      |   | Number of binding               |      |      |   | Number of binding               |      |      |      |      |   |
| Phe10                                    | -      | -    | 1    | -    | - | His29                           | 1    | 1    | - | Tyr103                          | 1    | 1    | 1    | -    | 1 |
| Arg12                                    | 1      | 1    | 1    | -    | 1 | Gly52                           | 1    | -    | - | Tyr102                          | -    | -    | -    | 1    | - |
| Ile13                                    | 1      | 1    | 1    | 1    | 1 | Tyr59                           | 1    | -    | - | Tyr115                          | -    | -    | -    | 1    | - |
| Asp38                                    | 1      | 1    | 1    | 1    | - | Ser60                           | 1    | -    | - | Tyr116                          | 1    | 1    | 1    | -    | - |
| Arg78                                    | -      | -    | -    | -    | 1 | Asn63                           | 1    | -    | - | Arg123                          | -    | -    | -    | 1    | - |
| Gln91                                    | -      | 1    | 1    | 1    | - | Trp70                           | 1    | -    | - | Arg124                          | 1    | 1    | 1    | -    | 1 |
| Trh120                                   | -      | -    | -    | -    | 1 | Lys90                           | 1    | -    | - | Ala221                          | 1    | -    | -    | -    | - |
| Ser134                                   | 1      | 1    | 1    | -    | - | Met91                           | 1    | 1    | - | Arg360                          | -    | -    | -    | 1    | - |
| Asn335                                   | -      | 1    | 1    | -    | - | His192                          | -    | -    | 1 | Arg361                          | 1    | 1    | 1    | -    | 1 |
|                                          |        |      |      |      |   | Glu196                          | -    | -    | 1 | His420                          | 1    | 1    | 1    | 1    | - |
|                                          |        |      |      |      |   | His198                          | -    | -    | 1 | Cys422                          | 1    | 1    | 1    | -    | 1 |
|                                          |        |      |      |      |   | Ser202                          | -    | -    | 1 |                                 |      |      |      |      |   |

\* Nicotinamide-adenine-dinucleotide; \*\* Protoporphyrin ix containing Fe and \*\*\* N6-benzyl-nicotinamide-adenine-dinucleotide

## Supplementary files

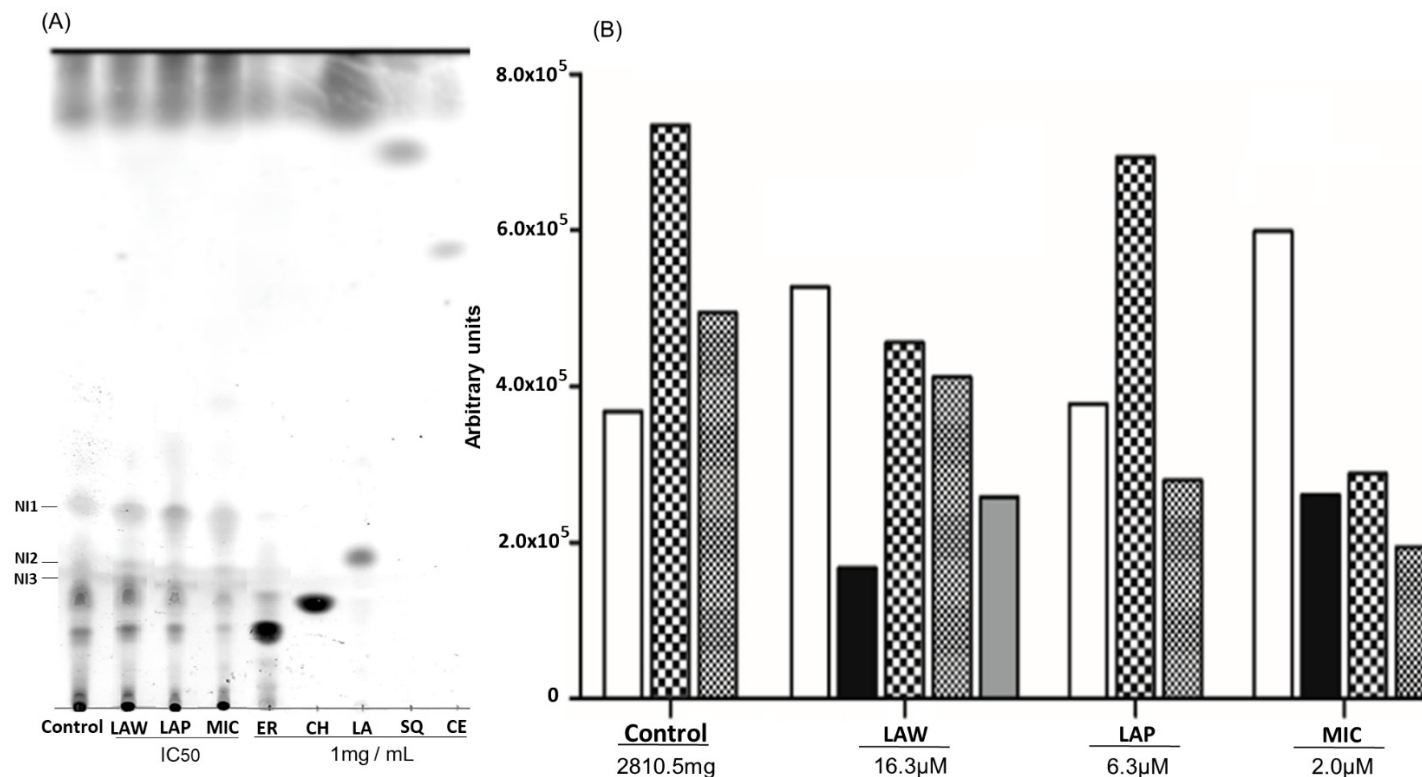

**Figure S1.** Inhibition of lipid biosynthesis in promastigotes. **(A)** Effect of oxyranes on the biosynthesis of *L. (V.) braziliensis* promastigote ergosterol: Lipid extracts of  $2810.5 \pm 208$  mg (fresh weight) of the promastigotes not incubated to the compounds (Control); incubated with IC<sub>50</sub> values of epoxymethyl-lawsone (LAW = 16.3 $\mu$ M), epoxy- $\alpha$ -lapachone (LAP = 6.3  $\mu$ M), miconazole (MIC = 2.0  $\mu$ M), and commercial ergosterol standards (ER = 1 mg/mL); cholesterol (CH = 1 mg/mL), lanosterol (LA = 1 mg/mL), squalene (SQ = 1 mg/mL), and cholesterol ester (CE = 1 mg/mL) were evaluated by Thin layer chromatography (TLC) for 24 h. After the chromatography tests, the lipid profiles were developed using chromatography sheet with “charring” solution. Not identified (NI). **(B)** The quantification of *L. (V.) braziliensis* promastigote sterols was obtained according to arbitrary values of the density of the lanes, using the imageMaster program (version 1.11). Not identified 1 (NI1 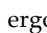); Not identified 2; (NI2 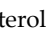); Not identified 3 (NI3 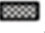); ergosterol (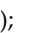); cholesterol (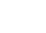); epoxymethyl-lawsone (LAW), epoxy- $\alpha$ -lapachone (LAP), miconazole (MIC).
